# Supplementary material
Source: publisher site journal article supplement (https://www.spandidos-publications.com/5226/downloadSupplementary)

Figure S1. Venn diagram of screening the candidate gene DAB2. GSE8553, GSE42301 and GSE47065, which were from the GEO datasets, were used to screen the candidate gene DAB2. GSE8553 and GSE42301 represented the differentially upregulated genes [ $|\text{Log}_2 \text{fold-change (FC)}| > 1$ ;  $P < 0.05$ ] in bleomycin-induced fibrotic lungs of C57BL/6 mice. GSE47065 showed the differentially downregulated genes ( $|\text{Log}_2 \text{FC}| > 1$ ;  $P < 0.05$ ) in IGF-1R knockout mice. A total of four genes, including DAB2, TYROBP, FCER1G and SFRP1 were overlapped among the three GEO datasets. GEO, gene expression omnibus; DAB2, Disabled-2 actin; IGF-1, insulin-like growth factor; IGF-1R, IGF-1 receptor.

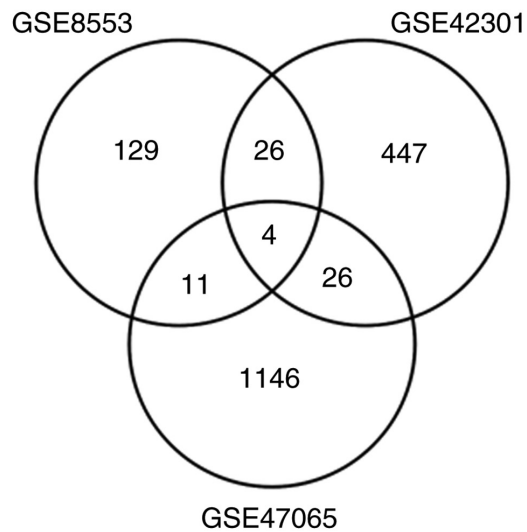

Supplement: Supplementary file 1 [file downloadSupplementary]
